# Supplementary material
Source: Springer Nature journal article supplement (https://www.springermedizin.de/resource/supplementary/12947_2007_190_MOESM4_ESM.pdf/9556546)

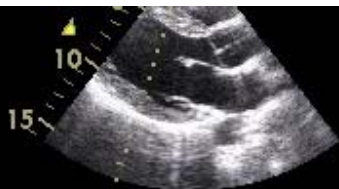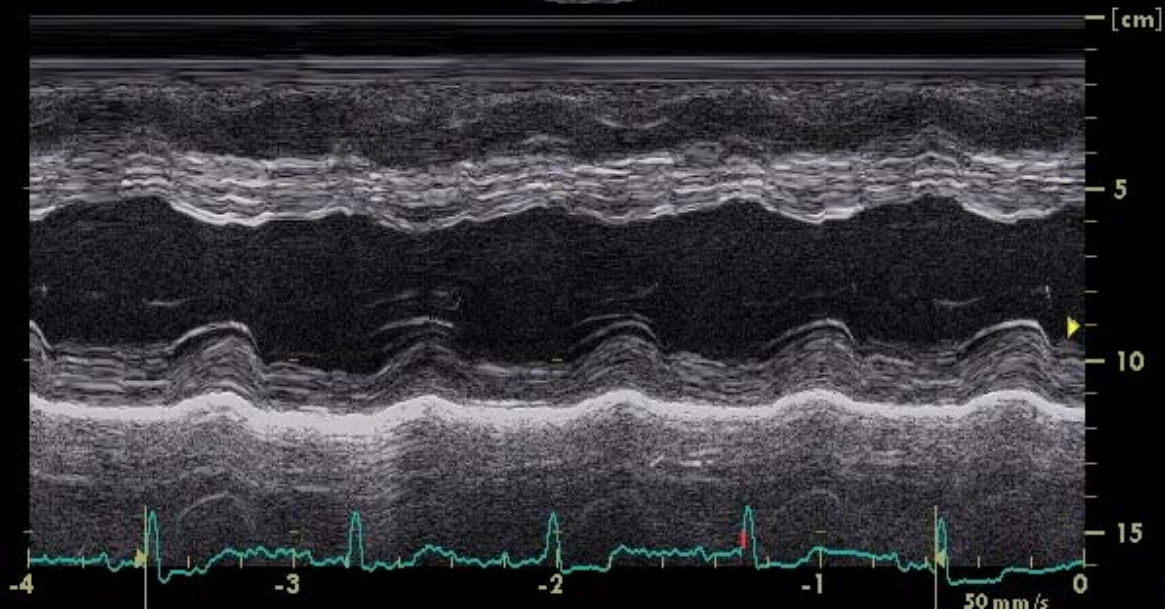

79  
HR

Supplement: MOESM4 [file 9556546]
